# Supplementary material
Source: PubMed Central journal article supplement (PMC2749490)
Supplement: NIHMS138017-supplement-01.pdf [file NIHMS138017-supplement-01.pdf]

# Staurosporine Tethered Peptide Ligands for cAMP-dependent Protein Kinase A (PKA): Optimization and Selectivity Profiling

Carolyn D. Shomin, Scott C. Meyer and Indraneel Ghosh\*

## Supplementary Information

### Contents

- 1 Mode of Inhibition of PKA BL, **4**
  - a. Kinetic Analysis of Initial PKA BL, **4**
  - b. Kinetic Analysis of Selected Cyclic Peptide, **1b**
- 2 Optimization of PKA BL
  - a. Amide Isostere PKA BL, **7** Stability
  - b. Staurosporine Warhead (**1b**) Affinity for PKA
- 3 Kinase Panel Screening Data for PKA BL, **4**, Amide Isostere PKA BL, **7**, and Staurosporine Warhead, **1a**
  - a. Analysis of the Selectivity of the Staurosporine Warhead, **1a**
  - b. Analysis of the Selectivity of the PKA BL, **4**
- 4 Compound Characterization
  - a. Mass Spectrometry Data
  - b. HPLC Traces
  - c. Amino Acid Analysis

### Inhibitor Characterization: Mode of Inhibition

Kinetic experiments with PKA and the BL and cyclic peptide data were fit to the following models to determine the mode of inhibition and the inhibitor  $K_i$ .

$$v = \frac{V_{\max}}{1 + \left(\frac{Km}{[S]}\right)\left(1 + \frac{I}{K_i}\right)}$$

Equation S1. Competitive Inhibition

$$v = \frac{V_{\max}}{\left(1 + \frac{I}{K_i} + \frac{Km}{[S]}\right)}$$

Equation S2. Uncompetitive Inhibition

$$v = \frac{V_{\max}}{\left(1 + \frac{I}{K_i}\right)\left(1 + \frac{Km}{[S]}\right)}$$

Equation S3. Noncompetitive Inhibition

$$v = \frac{V_{\max}}{\left(\left(\frac{Km}{[S]}\right)\left(1 + \frac{I}{K_i}\right) + \left(1 + \frac{I}{\alpha K_i}\right)\right)}$$

Equation S4. Mixed Inhibition

Where:

$v$  = rate (Counts/min/min)

$Km$  = substrate concentration at half maximal rate

$V_{\max}$  = maximal rate

$S$  = substrate (kemptide, LRRASLG)

$K_i$  = inhibitor dissociation constant

$\alpha$  = constant

## Kinetic Analysis of the initial PKA BL: Compound 1 with PKA to Determine the Mode of Inhibition

### Competitive Inhibition

| Parameters         |                 |
|--------------------|-----------------|
| Vmax               | 520 ± 42        |
| Km                 | 10.1 ± 3.4      |
| Ki                 | 3.4e-4 ± 1.0e-4 |
| Goodness of Fit    |                 |
| Degrees of Freedom | 15              |
| AICc               | 143             |
| R2                 | 0.979           |
| Sum of Squares     | 26,768          |
| Sy.x               | 42.2            |

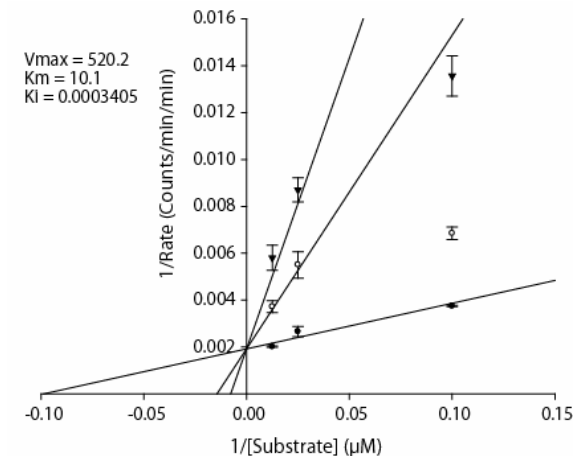

### Uncompetitive Inhibition

| Parameters         |                  |
|--------------------|------------------|
| Vmax               | 561 ± 43         |
| Km                 | 13.9 ± 3.7       |
| Ki                 | 1.51e-3 ± 2.3e-4 |
| Goodness of Fit    |                  |
| Degrees of Freedom | 15               |
| AICc               | 138              |
| R2                 | 0.984            |
| Sum of Squares     | 20,826           |
| Sy.x               | 37.3             |

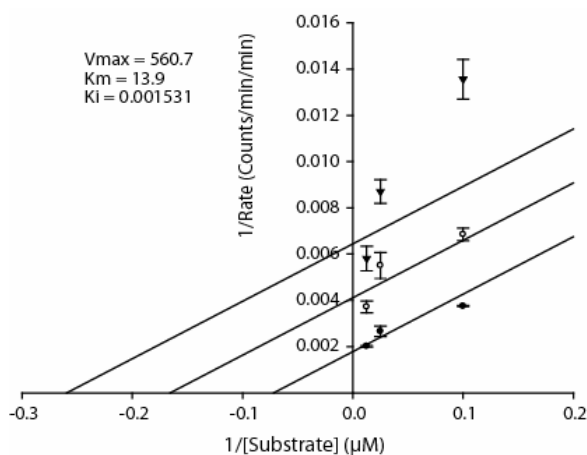

### Mixed Inhibition

| Parameters         |                  |
|--------------------|------------------|
| Vmax               | 536 ± 35         |
| Km                 | 11.2 ± 2.9       |
| Ki                 | 1.48e-3 ± 8.9e-4 |
| Alpha              | 1.56             |
| Goodness of Fit    |                  |
| Degrees of Freedom | 14               |
| AICc               | 136              |
| R2                 | 0.988            |
| Sum of Squares     | 15,268           |
| Sy.x               | 33.0             |

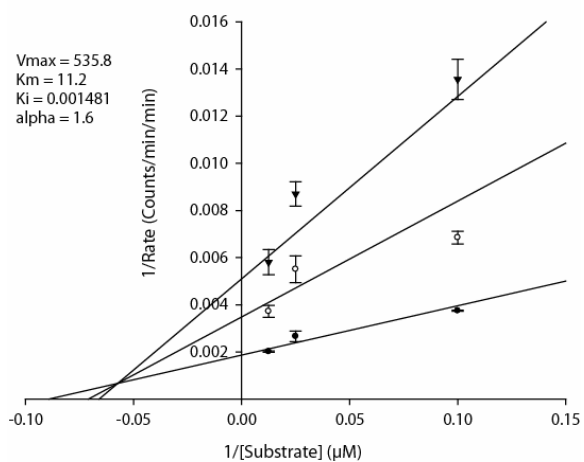

Figure S1. Lineweaver-Burk Analysis of the PKA Bivalent Ligand, **1**, Kinetic Experiments with PKA fit to competitive, uncompetitive and mixed inhibition.

Kinetic Analysis of the selected cyclic peptide (CTFRVFGCG), **1b**, with PKA to determine the mode of inhibition

### Noncompetitive Inhibition

Parameters

V<sub>max</sub> 973 ± 65

K<sub>m</sub> 13.3 ± 3.3

K<sub>i</sub> 85.6 ± 16.0

Goodness of Fit

Degrees of Freedom 15

AIC<sub>c</sub> 157

R<sup>2</sup> 0.991

Sum of Squares 59,030

Sy.x 62.7

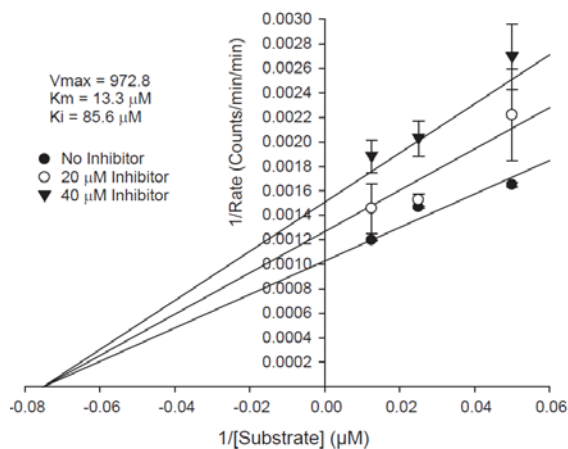

Figure S2. Noncompetitive Inhibition: Best Fit Lineweaver-Burk Analysis of the Cyclic Peptide Kinetic Experiments with PKA.

The kinetic experiments with the PKA bivalent inhibitor showed a best fit to noncompetitive inhibition suggesting that the bivalent inhibitor does not bind in the peptide substrate binding site. To determine the mode of inhibition of the cyclic peptide alone, kinetic kinase assays of the cyclic peptide, CTFRVFGCG, were performed. The cyclic peptide kinetic experiments analysis best fit to noncompetitive inhibition supporting the results of the bivalent inhibitor kinetic analysis. The K<sub>i</sub> of 86 μM and the K<sub>m</sub> of 13.3 for kemptide was similar to literature values, K<sub>m</sub> for kemptide = 16 μM, and previous experiments with the IC<sub>50</sub> of the cyclic peptide = 57 μM.

**Kinetic Kinase Assays** Kinetic assays were performed in duplicate. In a 60 μl final volume, [<sup>32</sup>P]ATP (30 μM) initiated the reaction with 0.52 nM PKA and Kemptide (LRRASLG, 20, 40, and 80 μM) in the presence of the cyclic peptide (0, 20 and 40 μM) in PKA Assay Buffer (40 mM Tris, 20 mM Mg Acetate, pH 7.4) with 0.01% BSA and 2.5% DMSO. At 7 minute intervals, 10 μl of the reaction mixture was spotted on P81 phosphocellulose paper. The samples were washed three times in 500 ml of 0.85% phosphoric acid and once in 500 ml of ethanol for 5 minutes each. The amount of <sup>32</sup>P labeling of the peptide substrate was quantified using a Beckman LS 6000IC liquid scintillation counter.

IC<sub>50</sub>

### Increased Stability of the Amide Isostere PKA BL, 7, relative to the optimized PKA BL, 4

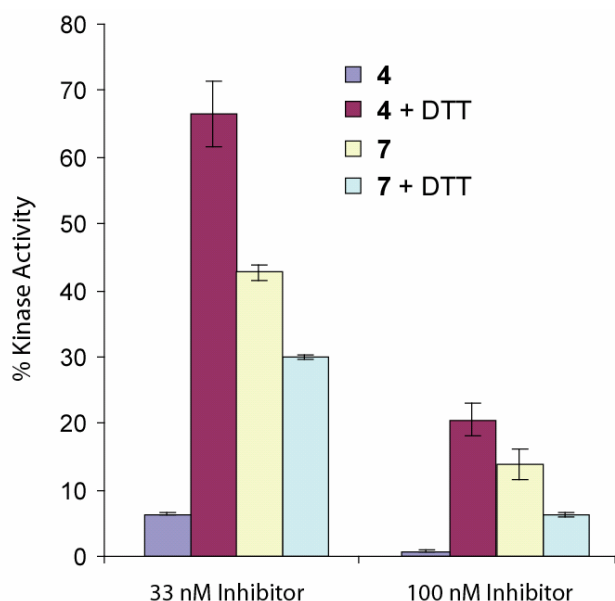

Figure S3. The Effect of Reducing Environments: DTT Assays of the Disulfide and Amide Isostere Bivalent Inhibitors. The PKA bivalent inhibitor contains a disulfide (cyclic peptide) that is susceptible to reduction, which was verified in the kinase assays with 7.5 mM DTT. An amide isostere was synthesized to increase the stability of the bivalent inhibitor and hence its utility. The DTT assays indicated a loss of potency of the disulfide bivalent inhibitor (> 10-fold) whereas the amide isostere was impervious to the reducing conditions.

**DTT Assays** Kinase assays were performed in triplicate. In a 30  $\mu$ l final volume, [ $\gamma$ - $^{32}$ P]ATP (30  $\mu$ M) initiated the reaction with 2.6 nM PKA and Kemptide (LRRASLG, 30  $\mu$ M) in PKA Assay Buffer (40 mM Tris, 20 mM Mg Acetate, pH 7.4) with 7.5 mM DTT, 0.01% BSA and 2.5% DMSO. The reaction was quenched with 15  $\mu$ l of 1.8% Phosphoric Acid and 30  $\mu$ l of the reaction mixture was spotted on P81 phosphocellulose paper. The samples were washed three times in 500 ml of 0.85% Phosphoric Acid for 5 minutes. The samples were washed once in 500 ml of ethanol. The amount of  $^{32}$ P labeling of the peptide substrate was quantified using a Beckman LS 6000IC liquid scintillation counter. Data were normalized to reactions containing no inhibitors, which were run in triplicate.

## Determining Staurosporine Warhead with a Short Linker (**1a**) Affinity for PKA

In previous work, we evaluated the staurosporine derivative (CarboxyStaur) for activity against PKA. However, the staurosporine with a short linker provides a better control both for comparison to the BL and as a screening compound. Through the addition of a linker, any negative or positive effects that might be present in the generated BLs can be identified with the staurosporine derivative with a short linker, **1a**, via screening that would be missed with the staurosporine free acid (CarboxyStaur) first compound. The staurosporine derivative plus linker was assayed for activity against PKA ( $IC_{50} = 159$  nM). This compound, **1a**, was not significantly different than the first staurosporine derivative (CarboxyStaur,  $IC_{50} = 243$  nM) tested.

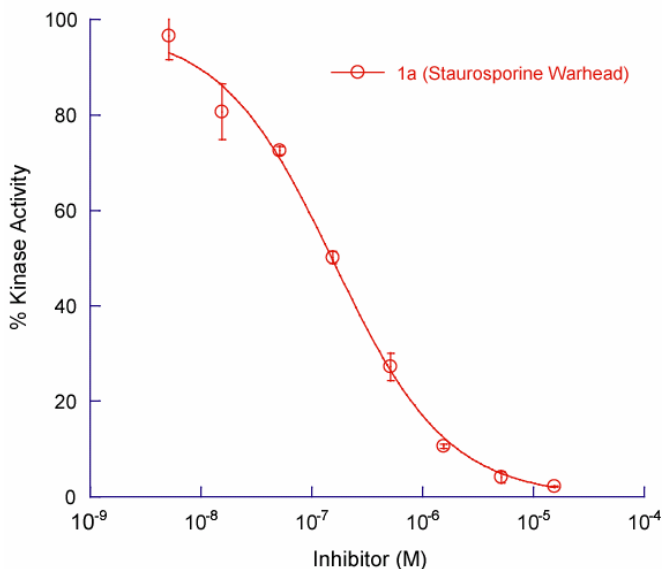

Figure S4. PKA assay to determine  $IC_{50}$  of the modified staurosporine derivative (Warhead) **1a**. At 2.6 nM PKA the  $IC_{50}$  of the staurosporine derivative is 159 nM.

**Determining the Selectivity of the Kinase Ligands Against a Large Kinase Panel (90 kinases)**

Table SI. Screening Data of the Kinase Ligands: **4**, **7**, and **1a**

| Ambit Gene Symbol | <b>4</b><br>(200 nM) | <b>7</b><br>(50 nM) | <b>1a</b><br>(500 nM) |
|-------------------|----------------------|---------------------|-----------------------|
| ABL1              | 100                  | 94                  | 68                    |
| ABL1(E255K)       | 100                  | 97                  | 92                    |
| ABL1(T315I)       | 78                   | 100                 | 35                    |
| ACVR1B            | 95                   | 100                 | 87                    |
| ADCK3             | 96                   | 91                  | 91                    |
| AKT1              | 100                  | 100                 | 100                   |
| AKT2              | 100                  | 100                 | 37                    |
| ALK               | 60                   | 92                  | 5.2                   |
| AURKA             | 19                   | 63                  | 4.2                   |
| AURKB             | 5.8                  | 33                  | 0                     |
| AXL               | 58                   | 81                  | 8                     |
| BMPR2             | 93                   | 99                  | 100                   |
| BRAF              | 100                  | 96                  | 100                   |
| BRAF(V600E)       | 100                  | 84                  | 94                    |
| BTK               | 62                   | 98                  | 31                    |
| CDK11             | 87                   | 100                 | 61                    |
| CDK2              | 100                  | 100                 | 69                    |
| CDK3              | 100                  | 100                 | 87                    |
| CDK7              | 74                   | 98                  | 100                   |
| CDK9              | 100                  | 99                  | 92                    |
| CHEK1             | 60                   | 91                  | 54                    |
| CSF1R             | 44                   | 83                  | 22                    |
| CSNK1D            | 100                  | 100                 | 89                    |
| CSNK1G2           | 100                  | 100                 | 99                    |
| DCAMKL1           | 100                  | 95                  | 100                   |
| DYRK1B            | 14                   | 79                  | 5.6                   |
| EGFR              | 96                   | 87                  | 54                    |
| EGFR(L858R)       | 86                   | 100                 | 53                    |
| EPHA2             | 100                  | 99                  | 80                    |
| ERBB2             | 100                  | 100                 | 95                    |
| ERBB4             | 100                  | 100                 | 70                    |
| ERK1              | 100                  | 100                 | 100                   |
| PTK2              | 91                   | 100                 | 65                    |
| FGFR2             | 66                   | 86                  | 27                    |
| FGFR3             | 85                   | 100                 | 43                    |
| FLT3              | 1                    | 7.4                 | 0.35                  |
| GSK3B             | 100                  | 74                  | 94                    |
| IGF1R             | 100                  | 100                 | 82                    |
| INSR              | 100                  | 92                  | 55                    |
| JAK2(Kin.Dom.2)   | 4                    | 42                  | 2.4                   |
| JAK3(Kin.Dom.2)   | 4.6                  | 16                  | 3.6                   |
| JNK1              | 83                   | 100                 | 52                    |
| JNK2              | 89                   | 88                  | 87                    |

|                    |      |     |      |
|--------------------|------|-----|------|
| JNK3               | 65   | 85  | 55   |
| KIT                | 39   | 85  | 7.4  |
| KIT(D816V)         | 0.65 | 6.5 | 1    |
| KIT(V559D,T670I)   | 4.1  | 59  | 4.8  |
| LKB1               | 81   | 100 | 41   |
| MAP3K4             | 94   | 96  | 95   |
| MAPKAPK2           | 100  | 100 | 100  |
| MARK3              | 18   | 61  | 16   |
| MEK1               | 100  | 95  | 100  |
| MEK2               | 100  | 87  | 86   |
| MET                | 77   | 100 | 46   |
| MKNK1              | 96   | 100 | 82   |
| MKNK2              | 57   | 100 | 39   |
| MLK1               | 0.65 | 5.5 | 0.55 |
| p38-alpha          | 89   | 95  | 93   |
| p38-beta           | 100  | 100 | 100  |
| PAK1               | 14   | 66  | 4    |
| PAK2               | 36   | 72  | 14   |
| PAK4               | 40   | 90  | 34   |
| PCTK1              | 94   | 98  | 75   |
| PDGFRA             | 41   | 100 | 7    |
| PDGFRB             | 3.2  | 23  | 0.05 |
| PDPK1              | 16   | 48  | 18   |
| PIK3C2B            | 100  | 100 | 98   |
| PIK3CA             | 89   | 100 | 100  |
| PIK3CG             | 100  | 91  | 15   |
| PIM1               | 53   | 79  | 20   |
| PIM2               | 100  | 100 | 100  |
| PIM3               | 26   | 66  | 10   |
| PKAC-alpha         | 19   | 10  | 52   |
| PLK1               | 95   | 100 | 85   |
| PLK3               | 100  | 98  | 100  |
| PLK4               | 4.9  | 5.7 | 3.6  |
| PRKCE              | 0    | 0   | 0.6  |
| RAF1               | 89   | 100 | 73   |
| RET                | 40   | 94  | 5.6  |
| RPS6KA3(Kin.Dom.1) | 100  | 100 | 44   |
| SNARK              | 0.45 | 1.8 | 3.2  |
| SRC                | 100  | 100 | 72   |
| TGFBR1             | 100  | 100 | 75   |
| TIE2               | 65   | 100 | 38   |
| TRKA               | 57   | 98  | 13   |
| TSSK1              | 17   | 100 | 2.6  |
| TYK2(Kin.Dom.2)    | 62   | 100 | 19   |
| VEGFR2             | 73   | 91  | 36   |
| YANK3              | 100  | 100 | 100  |
| ZAP70              | 16   | 57  | 2.2  |



The staurosporine derivative, PKA bivalent inhibitors (disulfide and amide isostere) were screened against 90 kinases (Ambit Biosciences) to determine a kinase inhibition profile for the compounds. The staurosporine derivative, was screened to see what enhancement if any was observed with the PKA bivalent inhibitors, but most importantly the kinase inhibition profile for the staurosporine reveals what kinases may be targeted using this compound as the warhead in our strategy. Clearly the staurosporine derivative is not as potent as staurosporine, but still retains a non-selective profile thus it could be used as a warhead in targeting other kinases. The profile of the disulfide is non-selective possibly due to the reduction of the disulfide bond due to assay conditions (7.5 mM DTT), which was confirmed in kinase assays with 7.5 mM DTT (above). To increase stability an amide isostere bivalent inhibitor was synthesized and screened. The profile of the amide bivalent inhibitor demonstrates enhanced affinity for PKA, the target kinase, without the non-selectivity observed with the disulfide bivalent inhibitor.

## Analysis of the Selectivity of the Staurosporine Warhead with Linker (St3BA) Relative to Staurosporine

Table SII. Kinases (from 90 kinase panel) that have Kinase-Staurosporine Co-Crystal Structures

| Kinase        | PDB Code | Interacting Residue(s)* | Binding Relative to Staurosporine | Reference      |
|---------------|----------|-------------------------|-----------------------------------|----------------|
| <b>PKA</b>    | 1STC     | E127, E170              | (-) 14-fold worse                 | Prade et al    |
| <b>CHK1</b>   | 1NVR     | E91, E134               | (-) 84-fold worse                 | Zhao et al     |
| <b>PDK1</b>   | 1OKY     | E166, E209              | (-) 52-fold worse                 | Komander et al |
| <b>CDK2</b>   | 1AQ1     | D86, Q131               | (-) 50-fold worse                 | Lawrie et al   |
| <b>PIM1</b>   | 1YHS     | D128                    | (-) 31-fold worse                 | Jacobs et al   |
| <b>GSK3B</b>  | 1Q3D     | --                      | (-) 7-fold worse                  | Bertrand et al |
| <b>EGFR</b>   | 2ITW     | --                      | No change                         | Yun et al      |
| <b>JAK3</b>   | 1YVJ     | R953                    | No Change                         | Boggon et al   |
| <b>ZAP70</b>  | 1U59     | R465                    | (+) 3-fold better                 | Jin et al      |
| <b>PIK3CG</b> | 1E8Z     | T886, D964              | (+) 6-fold better                 | Walker et al   |

\*Methylamino group on Staurosporine Hydrogen Bonds to these Residues

The kinase inhibition profile for the staurosporine derivative (warhead, **1a**) was diminished relative to staurosporine for about half of the kinases screened (45). This decrease in binding may be due to the loss of the aminomethyl (staurosporine) hydrogen bonding interactions that are observed in the co-crystal structures referenced in Table SII. The staurosporine warhead is derivatized at this position resulting in an amide. For the kinase structures that hydrogen bond to the aminomethyl group of staurosporine through an aspartic or glutamic acid the affinity for the staurosporine derivative (**1a**) is diminished on the order of 7 to 84-fold worse. The only exception is PIK3CG (6-fold improvement), which has T886 and D964 as interacting residues and it is possible that the amide group still interacts with T886. Additionally, if there are no observable hydrogen bonding interactions or the interacting residues are arginines there appears to be no diminished affinity as for these kinases there was either no change or a modest increase in affinity (3-fold, ZAP70). The only exception to this is GSK3B, for which there is a 7-fold decrease in affinity despite the lack of any observable hydrogen bonding interactions. This may be due to a steric effect of derivatization at the aminomethyl group. Clearly, the change in hydrogen bonding potential of the staurosporine derivative relative to staurosporine is influential in the affinity of the derivative for kinases.

### Selectivity Enhancement of the PKA BL (**4**)

To determine the contribution of the cyclic peptide to the selectivity profile of the PKA BL (**4**), the data from screening compound **4** against a panel of 90 kinases was normalized to the staurosporine derivative plus linker (**1a**). From this analysis of the data, the effect of staurosporine on the selectivity profile is accounted for and the effect of the addition of the cyclic peptide is pronounced. For PKA, an enhancement is expected for the BL relative to the warhead alone. Indeed this is observed for PKA with a >2-fold enhancement for the BL.

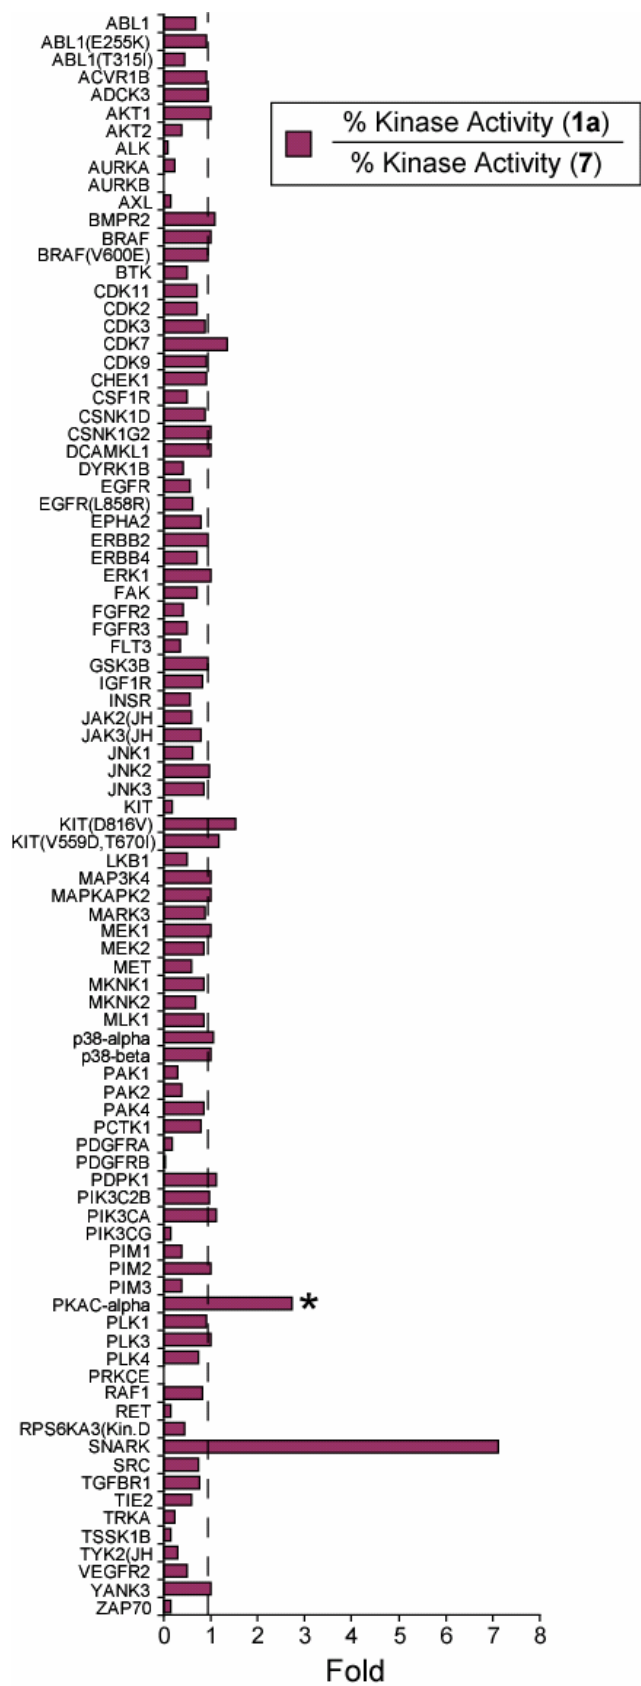

Figure S5. The PKA BL (4) selectivity relative to the staurosporine warhead (1a). The BL appears selective for PKA (>2-fold), with the exception of SNARK (7-fold).

## Summary of the activity of all PKA targeted compounds

Table SIII. Activity of PKA targeted Compounds

| Compound | IC <sub>50</sub> |
|----------|------------------|
| 2        | 2.1 nM           |
| 3        | < 0.52 nM        |
| 4        | < 0.52 nM        |
| 5        | 0.65 nM          |
| 1a       | 159 nM           |
| 7        | 12.6 nM          |
| 6        | 2.9 uM           |
| 1b       | 57 uM            |
| 6a       | > 1 mM           |

## Characterization of Synthesized Compounds

All compounds synthesized by solid phase peptide synthesis using standard fmoc chemistry, HPLC purified (gradient 20-70% in 40 minutes for BLs, 0-40% in 40 minutes for cyclic peptides, 0-100% in 100 minutes for biotinylated compounds), verified by mass spectrometry (MALDI, ), concentration determined by staurosporine absorbance ( $\lambda_{\text{max}} = 294 \text{ nm}$ ,  $\epsilon = 57.38 \text{ mM}^{-1}$ ) and confirmed by amino acid analysis (Keck Facility, Yale).

Table SIV. Mass Spectrometry Data for Compounds

| Compound | Expected m/z | Found m/z |
|----------|--------------|-----------|
| 2        | 1748         | 1748.4    |
| 3        | 1890         | 1889.9    |
| 4        | 2032         | 2032.3    |
| 5        | 2174         | 2174.5    |
| 6        | 1746         | 1746.6    |
| 7        | 1954.5       | 1954.7    |
| 1a       | 778.9        | 779.3     |

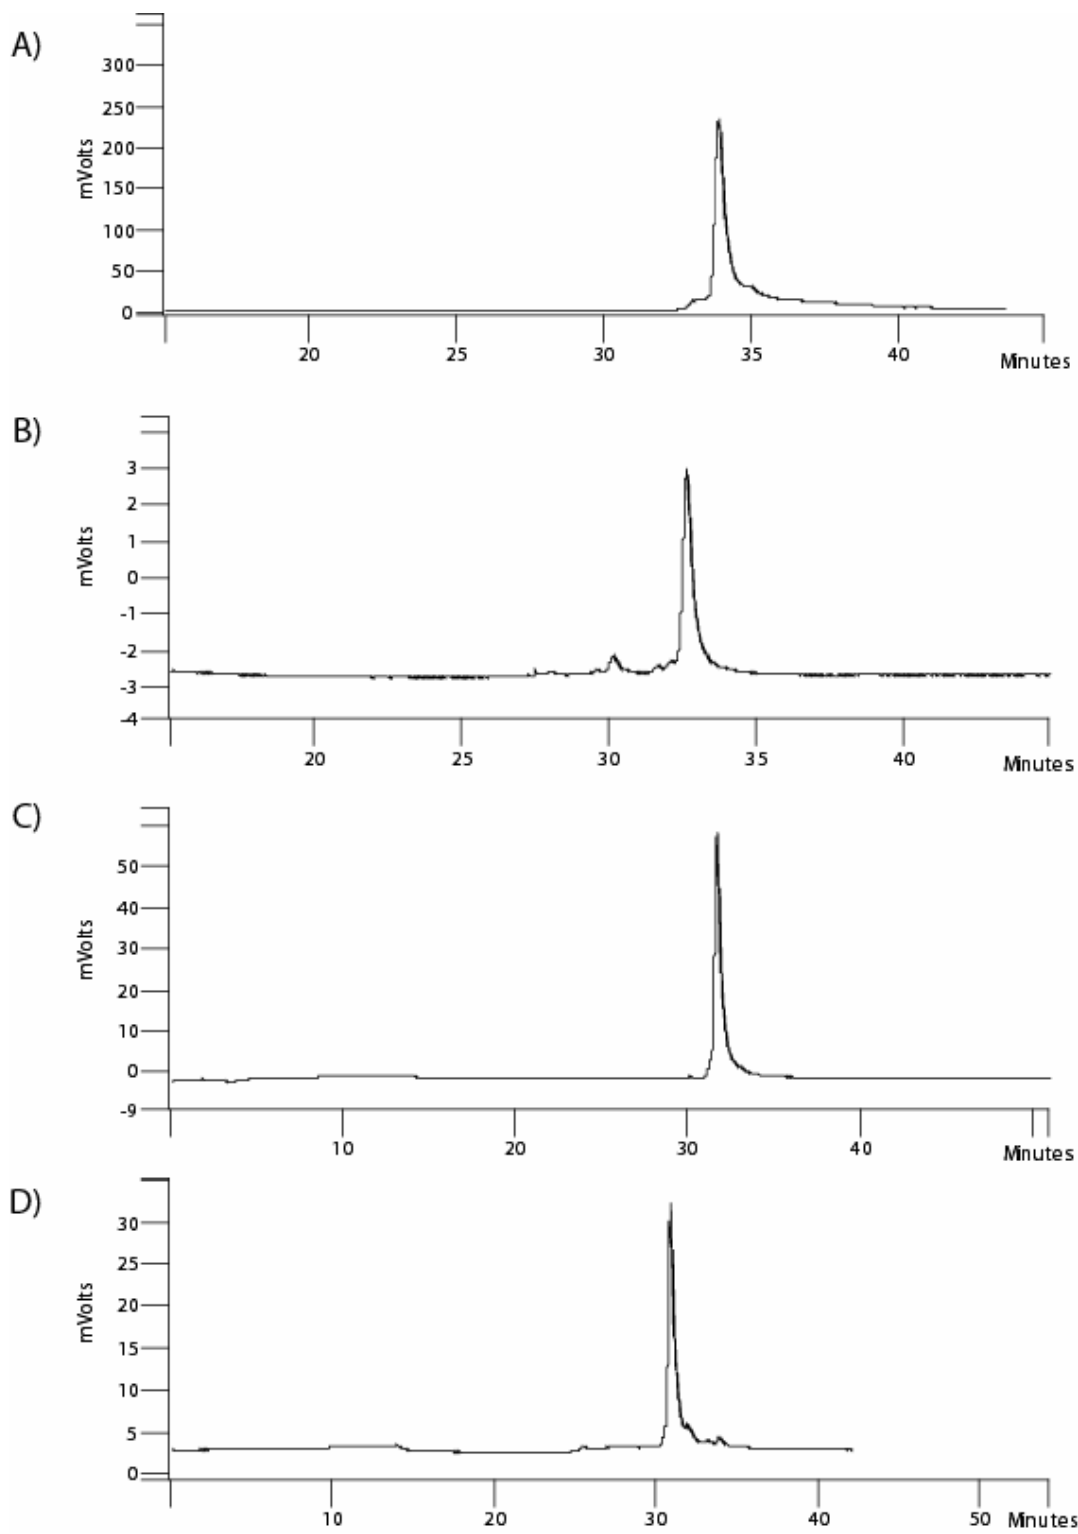

Figure S6. HPLC traces of PKA BLs of Varying Linker Composition. A) HPLC trace of compound 2. B) HPLC trace of compound 3. C) HPLC trace of compound 4. D) HPLC trace of compound 5.

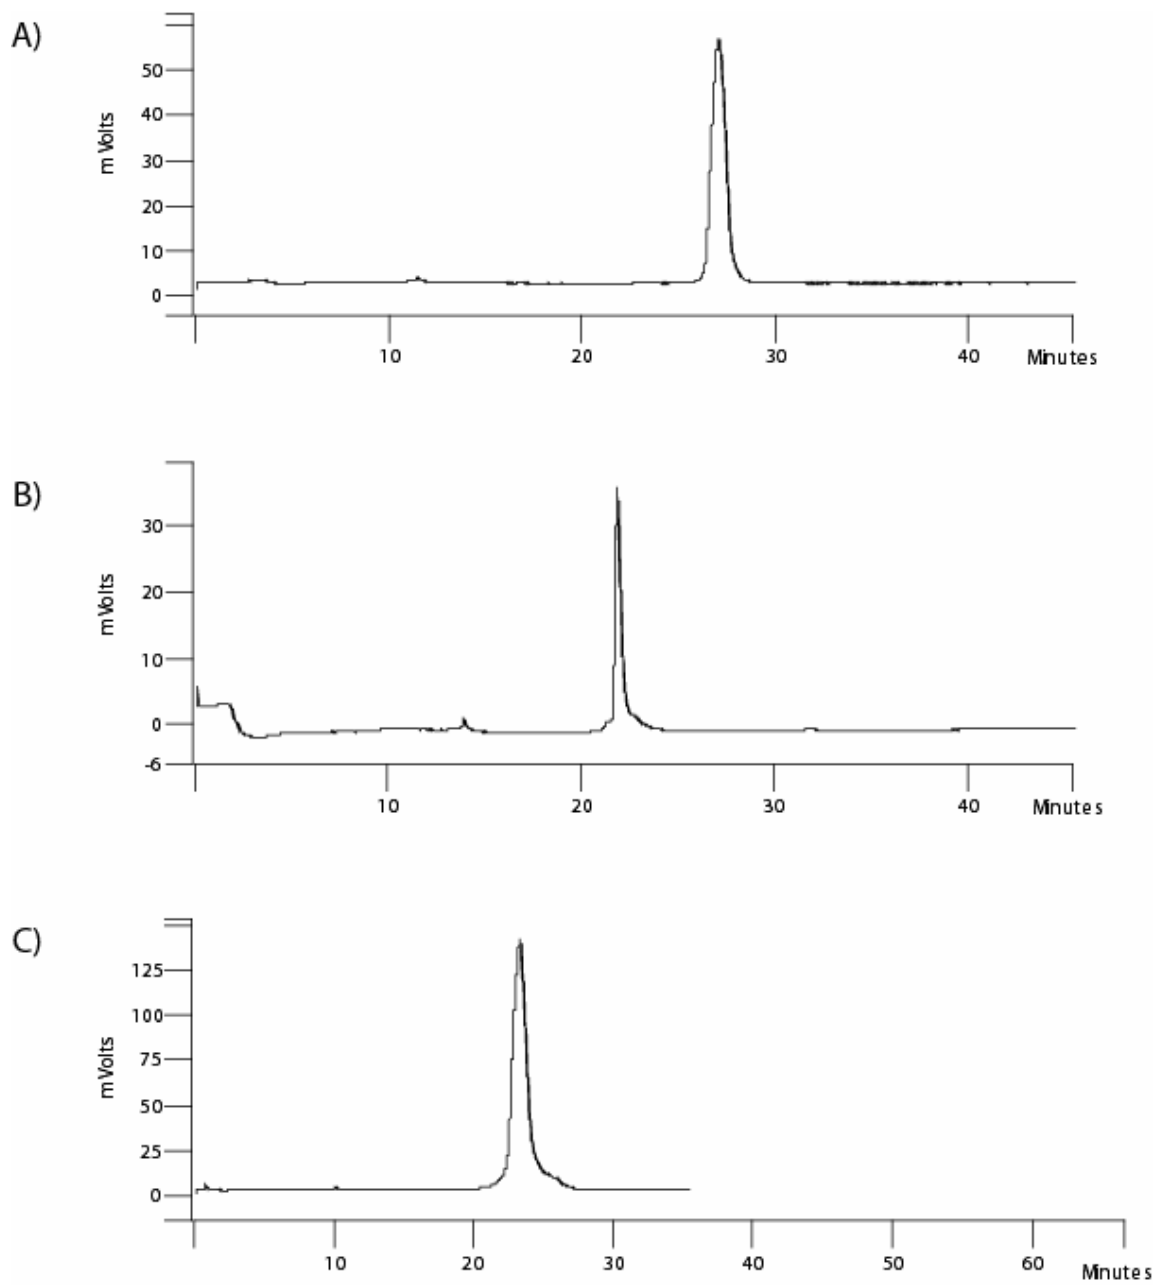

Figure S7. HPLC traces of the staurosporine warhead (**1a**, A), the adenosine PKA BL (**6**, B) and the amide PKA BL (**7**, C).

Table SV. Amino Acid Analysis of Compounds (Keck Facility, Yale University)

| Compound | Arg       | Gly      | Thr       | Val       | Phe       | Asx   |
|----------|-----------|----------|-----------|-----------|-----------|-------|
| <b>2</b> | 0.922 (1) | 2.21 (2) | 0.863 (1) | 0.938 (1) | 2.07 (2)  |       |
| <b>3</b> | 0.715 (1) | 2.23 (2) | 0.761 (1) | 0.891 (1) | 0.747 (2) |       |
| <b>4</b> | 0.952 (1) | 2.16 (2) | 0.841 (1) | 0.998 (1) | 2.05 (2)  |       |
| <b>5</b> | 0.955 (1) | 2.16 (2) | 0.858 (1) | 0.979 (1) | 2.05 (2)  |       |
| <b>6</b> | 0.971 (1) | 2.48 (2) | 0.834 (1) | 0.904 (1) | 1.82 (2)  |       |
| <b>7</b> | 0.572 (1) | 3.22 (1) | 0.527 (1) | 0.552 (1) | 1.54 (2)  | 0.583 |

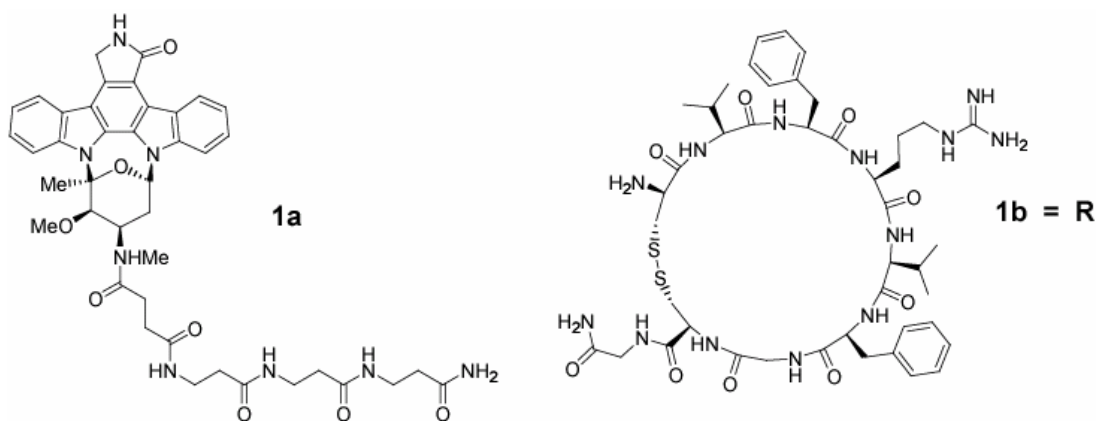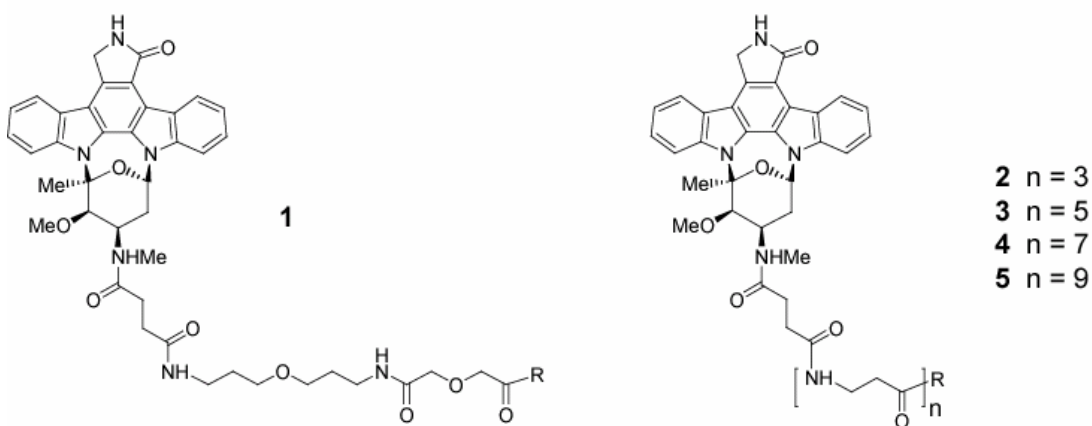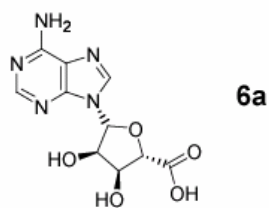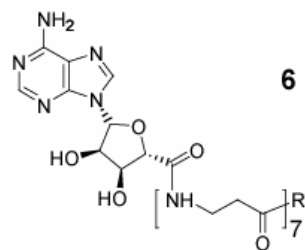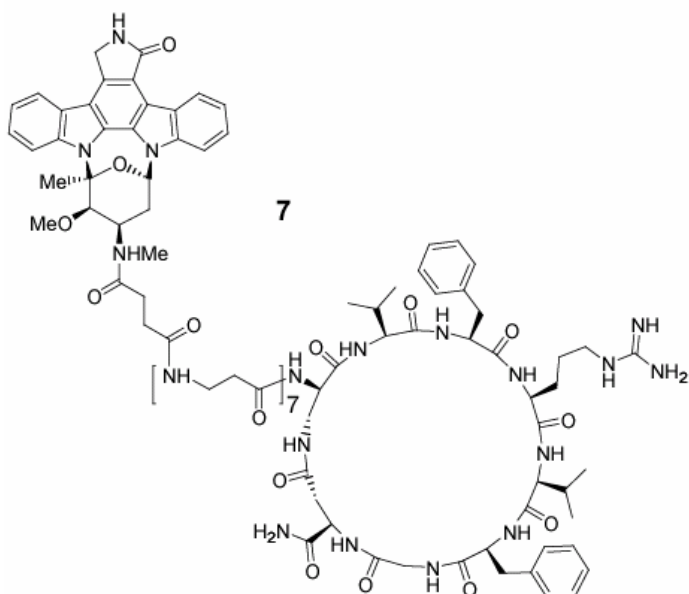

Figure S8. Chemical Structures of Kinase Ligands.
